## 14 **Summary**

15 In many eukaryotic cells, directed molecular transport occurs along microtubules. Within  
16 neuronal axons, transport over vast distances particularly relies on uniformly oriented  
17 microtubules, whose plus-ends point towards the distal axon tip (+end out). However, axonal  
18 microtubules initially have mixed orientations, and what breaks this orientation symmetry is  
19 poorly understood. Using live imaging of primary *Drosophila melanogaster* neurons and physical  
20 modelling, we found that +end out microtubules surpass a growth transition and undergo  
21 persistent long-term growth near the advancing axon tip. In contrast, oppositely oriented  
22 microtubules remain short. Using experimental perturbations, we confirmed that the enhanced  
23 growth of +end out microtubules is critical for achieving uniform microtubule orientation.  
24 Computer simulations of axon development incorporating our data returned +end out  
25 microtubules along the entire axonal length, suggesting that the accelerated growth kinetics of  
26 correctly oriented microtubules instructs overall axonal microtubule orientation. Our study thus  
27 leads to a holistic explanation of how axonal microtubules orient uniformly, a prerequisite for  
28 efficient long-range transport essential for neuronal functioning.

29

## 30 **Introduction**

31 Symmetry breaking is critical for many biological systems. An organism starts of as a single round  
32 cell that divides and differentiates into many cells, tissues and organ systems. The neuron, with  
33 its branched dendrites and sometimes exceedingly long axon, is one of the least symmetric cells  
34 found in animals. Axons connect neurons with distant targets and thus enable long-distance  
35 signal transmission throughout the body at high speed.

36 The enormous length of axons, which can extend over several meters in some vertebrate species,  
37 poses substantial logistical challenges. Proteins and genetic material originating in the cell body  
38 need to be actively transported down the axon. Transport occurs along microtubules, which are  
39 long, polarized polymers that undergo stochastic cycles of growth and shrinkage (**FIGURE 1A**).  
40 Motor proteins transport cargo either towards a microtubule's dynamic (i.e., growing or  
41 shrinking) +end, or the stabilized -end.

42 In immature axons, microtubule orientation is mixed, with 50-80% of all microtubules pointing  
43 with their +end out. During early neuronal development, the fraction of +end out axonal  
44 microtubules increases (del Castillo et al., 2015; Yau et al., 2016). In mature axons, ~95% of all  
45 microtubules point in the same direction (+end out) (Baas et al., 1989; Heidemann et al., 1981),  
46 enabling polarized transport (Millecamps and Julien, 2013). Deficits in polarized transport have  
47 been associated with human neurodegenerative diseases, such as Alzheimer's and Parkinson's  
48 disease (Millecamps and Julien, 2013). Despite the importance of polarized transport in neuronal  
49 axons, the mechanism that breaks microtubule symmetry is still poorly understood.

50 Microtubules in post-mitotic neurons are not attached to the centrosome (Kuijpers and  
51 Hoogenraad, 2011). Nucleation of new microtubules occurs from microtubule organising centres  
52 (MTOCs) such as somatic Golgi (Mukherjee et al., 2011) through elongation of severed pieces (Yu  
53 et al., 2008) or *de novo* polymerization alongside existing microtubules (Nguyen et al., 2014;  
54 Sánchez-Huertas et al., 2016). These newly formed microtubules often orient in the same  
55 direction as existing ones, enforcing any pre-existing orientation bias (Mattie et al., 2010;  
56 Mukherjee et al., 2020), which by itself cannot explain the +end out orientation of microtubules  
57 in mature axons. Furthermore, in axons, short microtubules pointing with their -end out can be  
58 transported towards the cell body (i.e., away from the tip) by cytoplasmic dynein, a process likely  
59 assisted by the microtubule bundling protein TRIM46 (del Castillo et al., 2015; Rao et al., 2017;  
60 van Beuningen et al., 2015). However, also this mechanism is not sufficient to explain how axonal  
61 microtubules orient with their +ends pointing away from the cell body (see below).

62

## 63 **Results**

### 64 ***Correctly oriented microtubules add more length per growth cycle***

65 To address how microtubule orientation in neuronal axons is achieved, we cultured acutely  
66 dissociated neurons from the *Drosophila melanogaster* larval CNS (Egger et al., 2013). To quantify  
67 microtubule growth in axons, we crossed *Drosophila* lines expressing the fusion protein EB1-GFP,  
68 which labels growing microtubule +ends with bright ‘comets’ (**FIGURE 1A-C**) (Stepanova et al.,  
69 2003). The distance over which a comet moves in the axon is equal to the overall length  $d_g$  that

70 is added to a microtubule between the start of its growth cycle and the catastrophe leading to  
71 microtubule shrinkage (**FIGURE 1A**). The direction of growth highlights whether a microtubule is  
72 oriented with its +end away from (+end out) or towards (-end out) the cell body. Time-lapse  
73 movies of EB1-GFP comets were converted into kymographs and analyzed using *KymoButler*  
74 (Jakobs et al., 2019) (**FIGURE 1C-D**).

75 The fraction of +end out microtubules increased over time and with increasing axonal length  
76 (**SUPPLEMENTARY FIGURE 1**), confirming that microtubule orientation increases during  
77 development (del Castillo et al., 2015; Yau et al., 2016). Most microtubule growth events (~66%)  
78 were found within the first 20  $\mu\text{m}$  from the advancing axon tip (**FIGURE 1A,E**). Microtubule growth  
79 lengths per cycle,  $d_g$ , were significantly higher near the axon tip compared to further away from  
80 it (**FIGURE 1F**). Furthermore, +end out microtubules added significantly more length per growth  
81 cycle than -end out microtubules, with the highest difference between +end out and -end out  
82 microtubules (~0.5  $\mu\text{m}/\text{cycle}$ ) found within the first 10  $\mu\text{m}$  from the axon tip (**FIGURE 1G**). Hence,  
83 the orientation of microtubules that added more length per growth cycle (i.e., +end out  
84 microtubules) became the dominant microtubule orientation during neuronal development,  
85 indicating a correlation between increased +end out microtubule growth and the fraction of +end  
86 out microtubules in axons.

87

88 ***Enhanced growth of +end out microtubules leads to unbounded growth***

89 On long time scales, differences in microtubule growth length per growth cycle should primarily  
90 affect average microtubule lengths  $l_{MT}$ . To test whether the rather small differences in  $d_g$  of  $\sim 0.5$   
91  $\mu\text{m}/\text{cycle}$  lead to biologically meaningful differences in the average expected microtubule lengths  
92 between +end out and -end out oriented microtubules, we formulated a 2-state Master equation  
93 model of microtubule growth and shrinkage (see (Dogterom and Leibler, 1993) & supplemental  
94 methods for details The model distinguishes two regimes (**FIGURE 2A**):

$$l_{MT} = \begin{cases} d_g d_s / (d_s - d_g) & d_s > d_g \quad (\text{'bounded' growth}) \\ \infty & d_s \leq d_g \quad (\text{'unbounded' growth}) \end{cases} \quad (1)$$

95 where  $d_s$  = lost length per shrinkage cycle.

96 When  $d_s \leq d_g$ , the average length added to the microtubule exceeds the average shrinkage length  
97 per cycle so that a microtubule will exhibit net growth and elongate as long as physically possible  
98 in its confined environment (called 'unbounded' growth). For  $d_s > d_g$ , however, growth is  
99 'bounded' and average microtubule lengths follow an exponential distribution with a mean of  
100  $d_s d_g / (d_s - d_g)$ . In practice, this means that microtubules with  $d_g \geq d_s$  would grow until encountering  
101 a physical barrier (for example the axon tip), while microtubules with  $d_s > d_g$  remain finite  
102 (approximately  $2 \mu\text{m}$  with  $d_s = 2.2 \mu\text{m}$  and  $d_g = 1 \mu\text{m}$ ).

103 We determined the microtubule shrinkage per cycle  $d_s$  by co-expressing a Jupiter-mCherry fusion  
104 protein (a tubulin marker) together with EB1-GFP in *D. melanogaster* axons. Microtubules  
105 stopped growing when the GFP signal disappeared from their +end, indicating a catastrophe  
106 event. Subsequent microtubule shrinkage was visualized by simultaneously imaging tubulin  
107 (Jupiter-mCherry), and quantified by tracing the resulting tubulin edges in the dual colour

108 kymographs (**FIGURE 2B-D**). Axonal microtubule shrinkage lengths were  $d_s = 2.2 \pm 0.2 \mu\text{m} / \text{cycle}$   
109 (mean  $\pm$  s.e.m., **FIGURE 2E**). With this value for  $d_s$ , our model predicted the divergence of  $l_{\text{MT}}$  at  
110 around  $d_g = 2.2 \mu\text{m}$  (**FIGURE 2F**). The measured values of  $d_g$  and  $d_s$  hence suggested that +end out-  
111 oriented microtubules within  $10 \mu\text{m}$  from the axon tip exhibit a considerably higher likelihood of  
112 unbounded growth than -end out microtubules within that range and any microtubule further  
113 away from the tip (**FIGURE 2F**). The enhanced growth of +end out microtubules near the axon tip  
114 implied a higher chance of survival for +end out microtubules while leaving -end out microtubules  
115 labile, thus establishing and maintaining overall axonal +end out microtubule orientation.

116

### 117 ***Enhanced growth of +end out microtubules is required for uniform microtubule orientation***

118 To test this hypothesis, we decreased microtubule growth using Nocodazole, a drug that disrupts  
119 microtubule polymerization. We also decreased microtubule growth by increasing the osmolarity  
120 of the cell culture medium (BRAY et al., 1991; Molines et al., 2020), potentially by decreasing the  
121 space for microtubules to polymerize into (Franze, 2020). In both approaches, axons exhibited  
122 significantly decreased +end out microtubule growth at the axon tip ( $< 10 \mu\text{m}$ ), with  $d_g < 1.7 \mu\text{m}$   
123 / cycle (**FIGURE 3A-E**). In agreement with our prediction, microtubules within these axons were  
124 overall significantly less uniformly oriented (**FIGURE 3D-E**), confirming an important role of the  
125 enhanced growth lengths per cycle of +end out microtubules in establishing axonal microtubule  
126 orientation.

127

128 ***p150 protein gradient in axon tips promotes enhanced microtubule growth***

129 However, why do +end out microtubules grow longer in the vicinity of the axon tip? Local  
130 gradients of microtubule growth-promoting factors could lead to an increase in +end microtubule  
131 growth in that region (**FIGURE 1G**). Axon tips contain a multitude of different proteins and are the  
132 site of protein synthesis (Lowery and Van Vactor, 2009). Locally synthesized microtubule growth-  
133 promoting factors include microtubule stabilizing proteins, such as p150 (Lazarus et al., 2013;  
134 Moughamian and Holzbaur, 2012), CRMP-2 (Fukata et al., 2002; Inagaki et al., 2001), and TRIM46  
135 (Rao et al., 2017; van Beuningen et al., 2015), as well as free tubulin and others (Eng et al., 1999).  
136 *Drosophila* has a p150 homologue which, similar to murine neurons (Moughamian and Holzbaur,  
137 2012), is enriched in axon (but not in dendritic) tips (**FIGURE 3F, H AND SUPPLEMENTARY FIGURE 2**).  
138 These dendritic processes exhibited no +end out microtubule orientation (**SUPPLEMENTARY FIGURE**  
139 **3**). Inserting the measured axonal p150 gradient profile into a mathematical model indicated that  
140 the observed gradient should, in theory, be able to cause different growth behaviours for +end  
141 out and -end out microtubules in axonal tips (**SUPPLEMENTARY FIGURE 4**). Accordingly, +end out  
142 microtubule growth lengths per cycle  $d_g$  were significantly higher in axons than in dendritic  
143 processes -which exhibited mixed microtubule polarities (**SUPPLEMENTARY FIGURE 3**).

144 To test this prediction further, we assessed microtubule dynamics in *wild-type*, *p150-RNAi*  
145 expressing neurons, and in neurons from *p150<sup>1</sup>/+* mutant flies (**FIGURE 3G-K**). *p150<sup>1</sup>* (also known  
146 as *Gl<sup>1</sup>*) mutants express a truncated p150-RNA transcript, which results in a dominant negative  
147 phenotype (Plough and Ives, 1935). Both the expression of *p150-RNAi* and of dominant negative  
148 *p150<sup>1</sup>/+* led to a significant decrease in +end out microtubule growth within 10  $\mu\text{m}$  from the axon



149 tip (**FIGURE 3L**). In agreement with our model, microtubule orientation was significantly decreased  
150 in both *p150-RNAi* and *p150<sup>1/+</sup>* axons compared to controls (**FIGURE 3M**), indicating that growth-  
151 promoting protein gradients at the axon tip do indeed have an important role in regulating the  
152 overall polarization of the axonal microtubule network.

153

#### 154 ***Kinesin 1 is required to establish p150 gradient***

155 Previous work showed that p150 accumulation at axon tips depends on the activity of the  
156 microtubule-specific molecular motor protein kinesin 1 (Moughamian and Holzbaur, 2012;  
157 Twelvetrees et al., 2016), which preferentially enters axons over dendrites (Tas et al., 2017).  
158 Accordingly, disruption of kinesin 1 function with an RNAi treatment led to considerable  
159 mislocation of p150 along axons (**SUPPLEMENTARY FIGURE 5A-D**). Again, the absence of a p150  
160 gradient in these neurons led to significantly decreased +end out microtubule growth near the  
161 axon tip, and hence to an overall decrease in axonal microtubule orientation (**SUPPLEMENTARY**  
162 **FIGURE 5E-I**).

163

#### 164 ***Uniform axonal microtubule polarity is established through a combination of microtubule*** 165 ***sliding, templating, and unbounded growth***

166 In addition to unbounded +end out microtubule growth identified here, other mechanisms have  
167 previously been suggested to be involved in regulating the overall axonal microtubule orientation,  
168 including dynein-mediated sliding of -end out microtubules towards the cell body (del Castillo et

169 al., 2015; Rao et al., 2017) and augmin-mediated microtubule templating, that is nucleating  
170 microtubules tend to have the same orientation as existing ones in the same cellular region)  
171 (Nguyen et al., 2014; Sánchez-Huertas et al., 2016). To investigate the role of these mechanisms  
172 and the enhanced microtubule growth identified in this study in establishing the axonal  
173 microtubule polarity, we used computer simulations.

174 When we implemented microtubule sliding and/or templating as the only mechanisms of  
175 microtubule sorting, simulations returned a steady state in which a fixed fraction of the axon  
176 length close to the cell body remained enriched with -end-out microtubules (**FIGURE 4A,B AND**  
177 **SUPPLEMENTARY FIGURE 6**), in disagreement with experimental findings (Yau et al., 2016) (**FIGURE**  
178 **4D**). Similarly, the unbounded growth of +end out microtubules alone (**SUPPLEMENTARY FIGURE 6C**)  
179 also failed to capture the high fractions of +end out microtubules observed experimentally at the  
180 axon entry (**FIGURE 4B**). However, integrating sliding, templating, and unbounded +end out  
181 microtubule growth in the simulation (assuming that the likelihood of exhibiting unbounded  
182 growth corresponds to a successful nucleation event) led to axons with +end out microtubule  
183 orientation all along their length, recapitulating our experimental results (**FIGURE 4C-D AND**  
184 **Supplementary Figure 6**). This highlights the necessity of multiple mechanisms to establish and  
185 maintain axonal microtubule orientation. Similarly, a combination of different microtubule  
186 growth-promoting proteins (e.g., tubulin, TRIM46, CRMP2, and/or p150) is likely to contribute to  
187 unbounded microtubule growth into the axon tip.

188

189 **Discussion**

190 We here found that an enrichment of microtubule growth-promoting proteins at the advancing  
191 axon tip leads to a transition of microtubule growth from a bounded to an unbounded state. This  
192 growth transition is an essential requirement for the establishment of the uniform +end out  
193 microtubule orientation found in mature axons. While previous studies suggested that  
194 microtubule dynamics are temporally and spatially constant during early axon formation  
195 (Seetapun and Odde, 2010), our results suggest that, at later stages of axon maturation,  
196 microtubule dynamics are heterogeneous (**FIGURE 1**).

197 p150, which we investigated here as an example growth-promoting protein, was concentrated  
198 at axon tips but was not enriched at dendritic tips (**SUPPLEMENTARY FIGURE 2**). Enhanced growth  
199 of +end out microtubules essential for establishing uniform microtubule orientation was only  
200 observed near axonal but not near dendritic tips (**SUPPLEMENTARY FIGURE 3**), confirming that  
201 differences in the localization of microtubule growth-promoting proteins correlate with  
202 differences in microtubule growth. Perturbations of p150 led to decreased +end out microtubule  
203 growth in the axon tip and thus to decreased overall microtubule order in the axon (**FIGURE 3**).

204 p150 is mainly known for of its role in the dynactin complex, which is an important cargo adapter  
205 protein for the molecular motor protein dynein (Gill et al., 1991). Since p150 and dynein are  
206 functionally related, it is difficult to separate their individual contributions to microtubule growth  
207 and cell body-directed sliding of -end out microtubules. However, it remains unclear whether  
208 p150 is required for dynein-mediated microtubule sliding (Ahmad et al., 1998; Waterman-Storer  
209 et al., 1997), and the *Drosophila melanogaster* oocyte also contains a biased microtubule  
210 cytoskeleton whose orientation is, presumably, maintained by p150 (Nieuwburg et al., 2017).

211 Hence, while p150 is unlikely to induce unbounded microtubule growth alone, it emerges as a  
212 key contributor to the establishment of microtubule orientation.

213 In addition to its contribution to the p150 gradient in axon tips (**SUPPLEMENTARY FIGURE 5**), kinesin  
214 1 is also thought to slide microtubules with their -end leading (del Castillo et al., 2015). Kinesin  
215 knockdown should thus decrease the number of -end out microtubules sliding into the distal axon.  
216 Instead, we observed that disruption of kinesin 1 function led to an increase in the fraction of -  
217 end out microtubules in the distal axon (**SUPPLEMENTARY FIGURE 5**), suggesting that kinesin 1  
218 affects microtubule orientation mainly via localising p150 or other microtubule growth or  
219 nucleation promoting proteins (e.g., CRMP-2 or MTOCs such as gammaTubulin) to axonal tips.

220 Furthermore, both kinesin 1 and p150/dynactin perturbations could potentially also affect MTOC  
221 localization in neurons. p150 was enriched at the tips of axonal but not of dendritic processes  
222 (**SUPPLEMENTARY FIGURE 2**). In *C. elegans* neurons, MTOCs may be located to the tips of dendritic  
223 processes (Liang et al., 2020). Removal of dynactin, which initiates cell body-directed transport  
224 from axonal tips (Moughamian and Holzbaur, 2012), could lead to an increased number of MTOCs  
225 also at axon tips, thereby promoting growth and nucleation of microtubules. However, our  
226 results showed a decrease in microtubule growth dynamics at axon tips after dynactin removal  
227 (**FIGURE 3**), indicating that the observed decrease in microtubule orientation was mostly due to  
228 decreased rather than promoted growth of axonal microtubules in the axon tip.

229 We propose the following model explaining the spontaneous establishment of microtubule  
230 orientation in developing axons. Growth-promoting proteins accumulate at the axon tip due to  
231 microtubule +end-directed transport by kinesin motors (**SUPPLEMENTARY FIGURE 5**). The resulting

232 protein gradient leads to a local bias in microtubule growth (**FIGURE 1, FIGURE 3**), rendering +end  
233 out microtubule growth into the axon tip unbounded (**FIGURE 2**). In contrast, short -end out  
234 microtubules are more prone to depolymerization and/or transport away from the tip by dynein-  
235 mediated cell body-directed sliding (del Castillo et al., 2015; Yau et al., 2016), thus contributing  
236 to the orientation bias of microtubules in the axon. This bias is further enhanced by augmin-  
237 mediated templating to establish and maintain a fully organized microtubule cytoskeleton (see  
238 **FIGURE 4E** for a schematic summary). Together with cell process length-dependent microtubule  
239 accumulation (Seetapun and Odde, 2010), these mechanisms cooperate to build the polarized  
240 microtubule network that enables efficient long-range transport in neuronal axons. Future work  
241 will reveal whether other cellular systems use similar mechanisms to organize their cytoskeleton.

242 **Materials and Methods**

243 **Key Resource Table**

| Reagent or Resource                      | Source                    | Identifier      |
|------------------------------------------|---------------------------|-----------------|
| <b>Experimental Models:</b>              |                           |                 |
| <b>Organisms/Strains</b>                 |                           |                 |
| <i>D. melanogaster: EB1-GFP</i>          | (Bulgakova et al., 2012)  | N/A             |
| <i>D. melanogaster: ubi EB1-GFP</i>      | (Shimada et al., 2006)    | N/A             |
| <i>D. melanogaster: Jupiter-mcherry</i>  | (Bergstralh et al., 2015) | N/A             |
| <i>D. melanogaster: p150<sup>1</sup></i> | Bloomington               | RRID:BDSC_504   |
| <i>D. melanogaster: p150-RNAi</i>        | Bloomington               | RRID:BDSC_3785  |
| <i>D. melanogaster: khc-RNAi</i>         | Bloomington               | RRID:BDSC_35770 |
| <i>D. melanogaster: elav-gal4</i>        | Bloomington               | RRID:BDSC_458   |
| <b>Antibodies</b>                        |                           |                 |

|                       |                          |                                   |
|-----------------------|--------------------------|-----------------------------------|
| Rb anti-p150          | (Nieuwburg et al., 2017) | N/A                               |
| Ms anti-alpha-tubulin | Abcam                    | Cat#: ab7291<br>RRID:AB_2241126   |
| Celltracker™          | Invitrogen               | Cat#: C2925                       |
| CF633 anti-Rb         | Cambridge Bioscience     | Cat#: BT20125                     |
| AF405 anti-Ms         | Thermo Fisher            | Cat#: ab175658<br>RRID:AB_2687445 |

### Software and Algorithms

|                |                           |                                                                                                 |
|----------------|---------------------------|-------------------------------------------------------------------------------------------------|
| MATLAB         | Mathworks                 | RRID:SCR_001622                                                                                 |
| Mathematica    | Wolfram                   | RRID:SCR_014448                                                                                 |
| KymoButler     | (Jakobs et al., 2019)     | <a href="https://gitlab.com/deepmirror/kymobutler">https://gitlab.com/deepmirror/kymobutler</a> |
| ImageJ         | (Schindelin et al., 2012) | RRID:SCR_003070                                                                                 |
| Neurite Tracer | (Pool et al., 2008)       | RRID:SCR_016566                                                                                 |

## 245 **Fly stocks**

246 Microtubule +end dynamics were visualized with a transgenic fly line expressing EB1-GFP  
247 heterozygously under its endogenous promoter (*wh;+;eb1-gfp/tm6b*, gift from the Brown  
248 laboratory in Cambridge) (Bulgakova et al., 2013) or a fly expressing EB1-GFP under a *ubiquitin*  
249 promoter (*ubi:eb1-gfp;+;+*, gift from the St. Johnston laboratory in Cambridge) (Shimada et al.,  
250 2006). Whole microtubules were labelled with Jupiter-mcherry (*wh;if/cyo;Jupiter-mcherry*, gift  
251 from the St. Johnston laboratory in Cambridge) (Bergstralh et al., 2015). Other stocks used: *p150<sup>1</sup>*  
252 (Bloomington # 504), *uas:p150-RNAi* (Vienna Drosophila Stock Center # 3785), *uas:khc-RNAi*  
253 (Bloomington # 35770), *khc27* (Bloomington # 67409), *khc17* (gift from the St. Johnston  
254 laboratory in Cambridge). *uas* constructs were driven by *elav-gal4* (Bloom# 458, *elav* is a neuron  
255 specific promoter that ensures the construct is only expressed in the CNS (Yannoni and White,  
256 1997)) and transgenic lines were generated through standard balancer crossing procedures.

## 257 **Primary cell culture**

258 3rd instar larvae were picked, and their CNS dissected similarly to (Egger et al., 2013; Sanchez-  
259 Soriano et al., 2010). As described in (Egger et al., 2013) the resulting primary culture comprised  
260 a mixture of terminally differentiated larvae neurons such as peripheral neurons alongside  
261 precursors cells and immature neurons of the adult fly brain. Thereby, the larval CNS lends itself  
262 to the study of a heterogenous population of neurons. The CNS tissue was homogenized and  
263 dissociated in 100 µl of Dispersion medium (Hank's Balanced Salt Solution (1xHBSS, Life  
264 Technologies, 14170088) supplemented with Phenylthiourea (Sigma-Aldrich P7629, 0.05mg/ml),  
265 Dispase (Roche 049404942078001, 4mg/ml), and Collagenase (Worthington Biochem. LS004214,



266 1mg/ml)) for 5 minutes at 37°C. The media was topped up with 200 µl of Cell Culture Medium  
267 (Schneider's Medium, Thermo Fisher 21720024) supplemented with insulin (2 µg/ml Sigma  
268 I0516) and fetal bovine serum (1:5 Thermo Fisher Scientific A3160801)) and cells were spun down  
269 for 6 min at 650 rcf. The pellet was resuspended in Cell Culture Medium at 5 brains/120 µl. Cells  
270 were grown at 26°C for 1.5 hours in a droplet of 30 µl Cell Culture Medium in a glass bottom dish  
271 between the coated glass and an uncoated glass slide on top. Initially the cells were cultured with  
272 the coated coverslip facing down. After 1.5 hours the chambers were flipped so that cells that  
273 did not attach floated off to the opposite (uncoated) side. Culture times were: 4-26 hours (for  
274 measuring microtubule orientation profiles in short and long axons), 22-26 hours (for measuring  
275 microtubule dynamics, both Patronin-YFP and EB1-GFP), and 22-48 hours (for measuring  
276 microtubule dynamics in dendritic processes).

277 To measure the effect Nocodazole has on microtubule orientation in axons, the medium was  
278 supplemented with 5µM of Nocodazole (Dissolved in DMSO, Sigma-Aldrich M1404-2MG) w  
279 approximately 12h post-plating and 12h before measuring microtubule dynamics. The control  
280 cells were treated with 0.025% DMSO in culture medium. Treatment and corresponding controls  
281 were always run in parallel, and when possible, from the same fly stock. *Uas* driven  
282 overexpression was controlled with a fly expressing both *elav::gal4* and *eb1-gfp* to control for  
283 the expression of gal4 protein.

284 To measure the effects of osmolarity changes in the surrounding medium we increased the  
285 osmolarity of the culture medium by approximately 100 mOsm by adding 4g NaCl. Cells were first  
286 cultured in normal media for 1.5h. Subsequently, the media was removed and replaced with

287 either fresh media (control) or media supplemented with 4g NaCl. Cells were again imaged after  
288 22-26h post plating.

### 289 ***Live imaging of microtubules***

290 All live imaging movies were acquired on a Leica DMI8 inverted microscope with a 63x objective  
291 (oil immersion, NA=1.4, Hamamatsu Orca Flash 2.0 camera) and at room temperature (22-25°C).  
292 To reduce autofluorescence during imaging, the culture medium was replaced with Live Imaging  
293 Solution (Thermo Fisher A14291DJ). Culture media was not replaced for imaging cells in  
294 Nocodazole, DMSO, and osmo+ to enable measurement of microtubule dynamics in the chosen  
295 media. For EB1-GFP imaging, an image (exposure time 500 ms) was taken every 2 seconds for 70-  
296 150 frames depending on sample bleaching. When imaging both EB1-GFP and Jupiter-mcherry  
297 simultaneously, one image was taken every 3 seconds for 100 frames (exposure 500ms). Lamp  
298 intensity was set to the lowest level that enabled visual identification of labels.

### 299 ***p150 antibody staining***

300 24 hours after plating, the cells were treated with 5µM of Celltracker™ (Invitrogen C2925) dye  
301 for 30 minutes to label cells in green. Subsequently, cells were fixed in pre-warmed 4%  
302 paraformaldehyde (PFA) (pH 7.2, 26°C) for 50 minutes. Post-fixation, the cells were washed in  
303 PBS once and then incubated with mouse alpha-tubulin 1:1000 (Abcam ab7291) and rabbit  
304 glued/p150 antibody 1:500 (gift from the St Johnston laboratory, (Nieuwburg et al., 2017))  
305 diluted in PBST (2x phosphate-buffered saline (PBS, Oxoid BR0014G) tablets in 400ml H<sub>2</sub>O + 1.2  
306 ml Triton X-100) + 0.01 g/ml bovine serum albumin at 4°C overnight (~14h). After two quick

307 washes in PBS, the cells were incubated with the secondary antibodies Alexa Fluor 647 (far-red,  
308 Thermo Fisher A-21236) and 405 (blue, Thermo Fisher A-31556) for 1.5 hours at room  
309 temperature. After another two quick PBS washes, the cells were mounted in Fluoromount  
310 (Thermo Fisher 00-4958-02) and imaged.

311 Images were analyzed by drawing a line along axon processes from the base of the axon to its tip  
312 in the tubulin channel. The intensity profiles for all 3 channels (p150, tubulin, and Celltracker)  
313 were extracted and normalized by their respective median values, and the p150 channel was  
314 normalized to the Celltracker channel. Finally, the *p150-RNAi* p150 profiles were normalized by  
315 their respective *wild-type* control. The resulting profiles (per axon) were then pooled over all  
316 biological replicates, binned in 10  $\mu\text{m}$  wide bins, and plotted in *Mathematica*.

### 317 ***EB1-GFP dynamics***

318 Kymographs of EB1-GFP tracks in *Drosophila melanogaster* axons were generated by first using  
319 the Neurite Tracer plugin in ImageJ to draw lines along axons or dendrites from the centre of the  
320 cell body to the farthest EB1-GFP comet signal, i.e. the distalmost growth event (Pool et al., 2008).  
321 Subsequently a custom *Mathematica* (<https://wolfram.com>) algorithm automatically generated  
322 kymographs from these lines by plotting the average pixel intensity of 3 adjacent pixels into rows  
323 of an image for each frame. The resulting image was then smoothed with a Gaussian kernel of  
324 size 3 and wavelet filtered to remove noise. Kymographs were analyzed with *KymoButler* and  
325 subsequently post processed in *MATLAB* (<https://mathworks.com>). Tracks were removed in case:  
326 (i) they displaced less than 2 pixels along the x-axis, (ii) they were slower than 1.5  $\mu\text{m}/\text{min}$ , (iii)  
327 they were faster than 20  $\mu\text{m}/\text{min}$ , and (iv) they were visible for less than 4 frames. Additionally,

328 control experiments and their corresponding treatment condition were discarded if the control  
329 axons exhibited a mean orientation below 0.8 or average growth velocities below 2  $\mu\text{m}/\text{min}$ . To  
330 account for outlier comets, the distance from the axon tip was calculated as the distance from  
331 the 0.95 quantile EB1-GFP comet.

332 Note that, mature *D. melanogaster* dendrites *in vivo* exhibit a mixed microtubule orientation  
333 (Stone et al., 2008). However, we cultured neurons only up to 48h which might be too short to  
334 form fully developed dendrites and our minimal cell culture medium is likely lacking growth  
335 factors that would enable further differentiation to form fully -end out dendrites. Additionally,  
336 vertebrate dendrites also appear to acquire their characteristic orientation over time (Baas et al.,  
337 1989).

### 338 ***Jupiter-mcherry & EB1-GFP***

339 Kymographs were prepared as for imaging EB1-GFP only (i.e. using Neurite Tracer). Individual  
340 shrinkage events were extracted by hand from the resulting kymographs using the ROI tool in  
341 *ImageJ* (<https://imagej.net>). The tracks were then analyzed and plotted with *MATLAB* and  
342 *Mathematica*. Measuring microtubule shrinkage dynamics was only possible in regions of low  
343 tubulin content, e.g., near the axon tip. We implicitly assumed that microtubule shrinkage  
344 depends neither on microtubule orientation nor on its position along the axon. However,  
345 experimental evidence suggests that a decrease in microtubule growth length correlates with an  
346 increase in shrinkage length (Vasquez et al., 2017), indicating that we likely overestimated  
347 microtubule lengths further away from the axon tip, therefore underestimating the difference  
348 between +end out microtubules at the tip and those further away from it.

349 **Statistics**

350 For comparing two groups the Wilcoxon rank sum test was used as implemented in MATLAB  
351 (<https://www.mathworks.com/help/stats/ranksum.html>). The standard error of the mean  
352 (s.e.m.) was calculated as  $s.e.m. = \sigma/\sqrt{n}$ . Here  $\sigma$  is the standard deviation of the sample and  $n$   
353 is the number of samples. We used the Kruskal Wallis test  
354 (<https://uk.mathworks.com/help/stats/kruskalwallis.html>) to compare several samples,  
355 followed by a Dunn Sidak post hoc test.

356 **Solution of the 2-state master equation**

357 We assumed that microtubules are able to either grow or shrink, and each of these two states ( $g$   
358 and  $s$  in short) has a probability distribution that depends on microtubule length  $l$  and time  $t$   
359 ( $p_g(l, t)$  and  $p_s(l, t)$ ). Microtubules can furthermore stop growing and start shrinking with rate  
360  $f_g = 1/t_g$  ( $t_g$  being the average microtubule growth time) and stop shrinking to start growing  
361 with rate  $f_s = 1/t_s$  ( $t_s$  being the average microtubule shrinkage time). Furthermore,  
362 microtubules are assumed to grow with velocity  $v_g$  and shrink with velocity  $v_s$ , while they are in  
363 the growing- or shrinking- state, respectively. Writing this as a master equation yields:

364 
$$\frac{\partial}{\partial t} p_s(l, t) = f_g p_g(l, t) - f_s p_s(l, t) + v_s \frac{\partial}{\partial l} p_s(l, t)$$

365 
$$\frac{\partial}{\partial t} p_g(l, t) = f_s p_s(l, t) - f_g p_g(l, t) - v_g \frac{\partial}{\partial l} p_g(l, t)$$

366 To solve this set of partial differential equations consider the following Fourier transformation of  
367  $p_s(l, t)$  and  $p_g(l, t)$ :

368 
$$p_{s,g}(l, t) = \int dk d\omega e^{i\omega t - ikl} \tilde{p}_{s,g}(\omega, k)$$

369 Substituting in the 2-state master equation yields:

370 
$$0 = \int dk d\omega e^{i\omega t - ikx} [(i\omega + f_g - ikv_g) \tilde{p}_g(\omega, k) - f_s \tilde{p}_s(\omega, k)]$$

371 
$$0 = \int dk d\omega e^{i\omega t - ikx} [(i\omega + f_s + ikv_s) \tilde{p}_s(\omega, k) - f_g \tilde{p}_g(\omega, k)]$$

372 Which can be written as a matrix equation:

373 
$$0 = \begin{pmatrix} i\omega + f_g - ikv_g & -f_s \\ -f_g & i\omega + f_s + ikv_s \end{pmatrix} \begin{pmatrix} \tilde{p}_g(\omega, k) \\ \tilde{p}_s(\omega, k) \end{pmatrix}$$

374 This equation only has non-zero solutions for  $\tilde{p}_g$  and  $\tilde{p}_s$  if the matrix determinant is equal to zero:

375 
$$0 = \det \begin{pmatrix} i\omega + f_g - ikv_g & -f_s \\ -f_g & i\omega + f_s + ikv_s \end{pmatrix} = (i\omega + f_g - ikv_g)(i\omega + f_s + ikv_s) + f_g f_s$$

376 This equation can be written as a dispersion relation:

377 
$$\omega(k) = \overbrace{\left( \frac{f_s}{f_s + f_g} v_g - \frac{f_g}{f_s + f_g} v_s \right)}{=\bar{v}} k + i \overbrace{\left( \frac{f_s f_g (v_g + v_s)^2}{(f_g + f_s)^3} \right)}{=\bar{D}} k^2 + O(k^3) = \bar{v} k + i \bar{D} k^2 + O(k^3)$$

378 For large times  $t$  both  $\omega$  and  $k$  are small so that we can drop terms of the order of  $k^3$ . The

379 dispersion relation is then the same as for a diffusion advection process with drift velocity  $\bar{v}$  and

380 Diffusion coefficient  $\bar{D}$ . For  $\bar{v} > 0$  the system will evolve like a diffusion advection process in

381 which microtubules would have no average length so that they will become as long as the system  
382 allows, i.e. their growth is “unbounded”.

383 For  $\bar{v} < 0$ , microtubules will exhibit an average length that depends on their dynamic  
384 parameters which can be calculated as follows: For large times, the overall probability to find a  
385 microtubule with length  $l$  at time  $t$  ( $p(l, t) = p_g(l, t) + p_s(l, t)$ ) can be approximated by a  
386 modified diffusion-advection equation:

$$387 \quad \frac{\partial}{\partial t} p(l, t) = \bar{D} \frac{\partial^2}{\partial l^2} p(l, t) + |\bar{v}| \frac{\partial}{\partial l} p(l, t)$$

388 The stationary state  $\frac{\partial}{\partial t} p(l, t) = 0$  is thus found by:

$$389 \quad 0 = \frac{\partial^2}{\partial l^2} p(l) + \frac{|\bar{v}|}{\bar{D}} \frac{\partial}{\partial l} p(l)$$

390 The general solution to this partial differential equation is:

$$391 \quad p(l) = C_1 \frac{\bar{D}}{|\bar{v}|} e^{-\frac{\bar{v}}{\bar{D}} l} + C_2$$

392 For  $p(l, t)$  to be normalisable:  $C_2 = 0$  and  $C_1 = \left(\frac{|\bar{v}|}{\bar{D}}\right)^2$ . So that:

$$393 \quad p(l) = \frac{|\bar{v}|}{\bar{D}} e^{-\frac{\bar{v}}{\bar{D}} l}$$

394 Finally, one can calculate the average microtubule length  $l_{MT}$  as the expectation value of the  
395 length:

396 
$$l_{MT} \equiv \langle l \rangle = \int_0^{\infty} dl l p(l) = \frac{\bar{D}}{|\bar{v}|} = \frac{f_s f_g (v_g + v_s)^2}{(f_g + f_s)^2 (v_s f_g - v_g f_s)}$$

397 For  $v_s/v_g \approx 1$ ,  $f_s/f_g \approx 1$ , and  $d = v/f$  the quadratic terms can be Taylor expanded to yield:

398 
$$l_{MT} \approx \frac{v_g v_s}{(v_s f_g - v_g f_s)} = \frac{d_g d_s}{d_s - d_g}$$

### 399 Analytical model to estimate microtubule growth per cycle based on immunostainings

400 The p150 fluorescence profile were calculated as described in the section on “p150 antibody  
401 staining”. Subsequently, an exponential function,  $p150(x) = b + e^{-s(x-x_0)}$ , was fitted to the  
402 first 12 bins of the data (corresponds to up until 120  $\mu\text{m}$  from the tip). Next, we assumed that  
403  $d_g(x) = A p150(x)^\alpha$ , i.e. microtubule growth per cycle is a simple power law in the p150  
404 fluorescence intensity. Thereby the expected growth length per cycle for a microtubule that  
405 starts growing at position  $x$  towards (1) or away (-1) from the cell body becomes:

406 
$$d_g(x, sign) = 0.5 \left( d_g(sign d_g(x) + x) + d_g(x) \right)$$

407 This function was subsequently fitted to the growth length data presented in **FIGURE 1F**. To do so,  
408 the experimental data was first binned in bins of size 10  $\mu\text{m}$  (like the staining data). Then we  
409 calculated the integral of  $d_g(x, sign)$  over each bin for each direction of growth and minimised  
410 the squared difference to the experimental results by varying  $A$  and  $\alpha$ . Note that we assumed  
411 that microtubules that grow way from the tip have to be at least 4  $\mu\text{m}$  away from it (average  
412 microtubule length (Yu and Baas, 1994)) and that microtubules that grow into the tip may  
413 penetrate it by 2  $\mu\text{m}$ .



## 414 **Microtubule sliding simulations**

415 Details of the simulation can be found in (Jakobs et al., 2020). We here present a brief description  
416 that focusses on the novel way in which new microtubules are added during the simulation.  
417 Microtubules were arranged with their long axis along the  $x$ -axis of a Cartesian coordinate system  
418 and their centers on a hexagonal lattice in the  $y - z$  plane. For simplicity all microtubules were  
419 assumed to have the same length,  $l_{MT} = 4\mu\text{m}$ . The inter-MT spacing in the  $y - z$  plane ( $\sim 30$  nm)  
420 was assumed to allow individual molecular motors (here, cytoplasmic dynein) to intervene  
421 between adjacent filaments and cross-link them with their respective 'cargo' or 'walking'  
422 domains. The simulation was initialized with 10 randomly oriented microtubules that were  
423 randomly distributed on a hexagonal lattice of length  $6\mu\text{m}$ . New microtubules were added to the  
424 system depending on the chosen nucleation model:

- 425 1. Sliding only: Microtubules were added at random locations with random orientation  
426 every 1100 seconds ( $\sim 18$  minutes). The time was optimised to yield axons of  
427 approximately the same length as cultured ones.
- 428 2. Sliding and templating: Microtubules were added at random locations every 1100  
429 seconds. The likelihood of being +end out was calculated by counting the number and  
430 orientation of microtubules at the location (the center of the microtubule) in which the  
431 microtubule is added. Then the number of +end out microtubules was divided by the  
432 total number of microtubules to calculate the probability of getting a +end out  
433 microtubule. Finally a random number is drawn between 0 and 1 to determine the  
434 orientation of the added microtubule.

435 3. Sliding and unbounded growth: A random location along the axon was chosen and a  
436 random microtubule orientation (50/50 +end out/-end out) introduced every 435  
437 seconds. As not every microtubule nucleated in this model, the rate of influx was selected  
438 to be higher to enable the same axon growth behaviour. Subsequently, we calculated the  
439 likelihood of exhibiting unbounded growth for a microtubule with the randomly selected  
440 orientation and location. To do so, we first calculated the average added length per  
441 growth cycle in 10 $\mu$ m bins (distance from the axon tip and separately for +end out and -  
442 end out microtubules) for each axon in the dataset presented in **FIGURE 1A-G**. For each  
443 bin we then queried whether growth was bounded (added length below 2.2 $\mu$ m) or  
444 unbounded. The likelihood of unbounded growth was calculated for each bin by counting  
445 the number of axons that exhibited unbounded growth in the bin and dividing that  
446 number by all axons. Subsequently, two exponential functions were fitted to the +end  
447 out and -end out microtubule data respectively to determine a function that gives the  
448 likelihood of unbounded growth for +end out and -end out microtubules as a function of  
449 distance from the axon tip. Finally, the random location and the predetermined  
450 orientation were used to look up the likelihood of unbounded growth and the  
451 microtubule was assumed to have nucleated successfully when a randomly drawn  
452 number [0,1] was smaller than that likelihood.

453 4. Sliding, templating and unbounded growth: A random location along the axon was  
454 chosen every 435 seconds and its orientation likelihood calculated as in 2. Subsequently,  
455 the unbounded growth likelihood was calculated as in 3. Microtubules only successfully  
456 entered the system if exhibiting unbounded growth.

457 Microtubules that were neighbours on the  $y$ - $z$  plane and overlapping along the  $x$ -axis were  
458 crosslinked by cytoplasmic dynein. For simplicity and due to the tight packing of microtubules in  
459 the bundle, only motion in parallel to the  $x$ -axis was considered. Microtubule velocities were  
460 determined by solving a set of force balance equations that characterize dynein interaction with  
461 the microtubules, detailed in (Jakobs et al., 2020). Furthermore, the left boundary was a leaky  
462 spring; microtubules that moved into the left boundary were subject to a force of 50 pN/ $\mu$ m and  
463 were able to leave the axon with a fixed rate per microtubule (0.00024/sec). The rate was  
464 adjusted to lead to axons of 50  $\mu$ m in length after approximately 24 hours simulation time. The  
465 right boundary was a constant force of 50 pN as described in (Jakobs et al., 2020). Axons were  
466 simulated for 50001 iterations ( $\sim$ 28 hours) and all results averaged over 50 separate simulations.  
467 Simulation parameters were as follows:

| Symbol | Description                                                | Value | Reasoning                                                                                                                                                                                                                                                           |
|--------|------------------------------------------------------------|-------|---------------------------------------------------------------------------------------------------------------------------------------------------------------------------------------------------------------------------------------------------------------------|
| $\chi$ | Fraction of overlapping microtubules that are cross linked | 1     | We previously explored how changing $\chi$ affects microtubule sliding (Jakobs et al., 2020; 2015). In this manuscript we simply wanted to explore the effect of different microtubule addition models on microtubule orientation in which we fixed the value at 1. |

|           |                                                                     |                                  |                                                                                                                                                    |
|-----------|---------------------------------------------------------------------|----------------------------------|----------------------------------------------------------------------------------------------------------------------------------------------------|
| $\lambda$ | Number of motors bound in an overlapping region [#/ $\mu\text{m}$ ] | 5                                | We quantified (by eye) the number of microtubule crosslinks in EM images of axons (Hirokawa et al., 2010) which was approximately 3 per 100 nm.    |
| $l_{MT}$  | Microtubule lengths [ $\mu\text{m}$ ]                               | 4 $\mu\text{m}$                  | Average microtubule lengths in axons measured in (Yu and Baas, 1994)                                                                               |
| $\xi$     | Drag coefficient of the axoplasm                                    | 1 pN<br>sec /<br>$\mu\text{m}^2$ | Same coefficient used in (Oelz et al., 2018)                                                                                                       |
| $f_s$     | Dynein stall force                                                  | 1.4 pN                           | Same coefficient used in (Oelz et al., 2018)                                                                                                       |
| $v_0$     | Dynein free velocity                                                | 0.86<br>$\mu\text{m}/\text{sec}$ | Same coefficient used in (Oelz et al., 2018)                                                                                                       |
| $dt$      | Simulation timestep per iteration                                   | 2<br>seconds                     | As we showed previously (Jakobs et al., 2020; 2015), this value is a good choice to ensure smooth movements of microtubules during the simulation. |

469 **Acknowledgements:** We would like to thank Eva Pillai, Dennis Bray, Michael Takla, and Kevin  
470 Chalut for inspiring discussions and proofreading, Andreas Prokop and Cristina Melero for  
471 teaching *Drosophila* dissection techniques, and Sarah Bray, Dmitry Nashchekin, Daniel St  
472 Johnston, and Nick Brown for providing *Drosophila* strains and laboratory space to work in. The  
473 authors acknowledge funding from the Wellcome Trust (PhD studentship 109145/Z/15/Z to  
474 MAHJ), the UK Biotechnology and Biological Sciences Research Council (Research Grant  
475 BB/N006402/1 to KF), the European Research Council (Consolidator Award 772426 to KF), and  
476 the Alexander von Humboldt Foundation (Alexander von Humboldt Professorship to KF).

477 **Competing interests:** AZ declares no competing interests, MAHJ and KF are shareholders of  
478 deepMirror (<https://deepmirror.ai>), a company that, amongst other things, sells custom  
479 interfaces of the freeware *KymoButler*.

480 **Supplementary Information:**

481 Figures S1-S6

## 482 **References**

- 483 Ahmad, F.J., Echeverri, C.J., Vallee, R.B., and Baas, P.W. (1998). Cytoplasmic dynein and dynactin are required for  
484 the transport of microtubules into the axon. *J Cell Biol* *140*, 391–401.
- 485 Baas, P.W., BLACK, M.M., and BANKER, G.A. (1989). Changes in microtubule polarity orientation during the  
486 development of hippocampal neurons in culture. *J Cell Biol* *109*, 3085–3094.
- 487 Bergstralh, D.T., Lovegrove, H.E., and St Johnston, D. (2015). Lateral adhesion drives reintegration of misplaced  
488 cells into epithelial monolayers. *Nat Cell Biol* *17*, 1497–1503.
- 489 Bray, D., Money, N.P., Harold, F.M., and Bamburg, J.R. (1991). Responses of growth cones to changes in osmolality  
490 of the surrounding medium. *J Cell Sci* *98 ( Pt 4)*, 507–515.
- 491 Bulgakova, N.A., Grigoriev, I., Yap, A.S., Akhmanova, A., and Brown, N.H. (2013). Dynamic microtubules produce an  
492 asymmetric E-cadherin-Bazooka complex to maintain segment boundaries. *J Cell Biol* *201*, 887–901.
- 493 Bulgakova, N.A., Klapholz, B., and Brown, N.H. (2012). Cell adhesion in *Drosophila*: versatility of cadherin and  
494 integrin complexes during development. *Current Opinion in Cell Biology* *24*, 702–712.
- 495 del Castillo, U., Winding, M., Lu, W., Gelfand, V.I., and Allan, V. (2015). Interplay between kinesin-1 and cortical  
496 dynein during axonal outgrowth and microtubule organization in *Drosophila* neurons. *eLife Sciences* *4*, e10140.
- 497 Dogterom, M., and Leibler, S. (1993). Physical aspects of the growth and regulation of microtubule structures.  
498 *Phys. Rev. Lett.* *70*, 1347–1350.
- 499 Egger, B., van Giesen, L., Moraru, M., and Sprecher, S.G. (2013). In vitro imaging of primary neural cell culture from  
500 *Drosophila*. *Nat Protoc* *8*, 958–965.
- 501 Eng, H., Lund, K., and Campenot, R.B. (1999). Synthesis of beta-tubulin, actin, and other proteins in axons of  
502 sympathetic neurons in compartmented cultures. *Journal of Neuroscience* *19*, 1–9.
- 503 Franze, K. (2020). Integrating Chemistry and Mechanics: The Forces Driving Axon Growth. *Annu. Rev. Cell Dev. Biol.*  
504 *36*, 61–83.
- 505 Fukata, Y., Itoh, T.J., Kimura, T., Ménager, C., Nishimura, T., Shiromizu, T., Watanabe, H., Inagaki, N., Iwamatsu, A.,  
506 Hotani, H., et al. (2002). CRMP-2 binds to tubulin heterodimers to promote microtubule assembly. *Nat Cell Biol* *4*,  
507 583–591.
- 508 Gill, S.R., Schroer, T.A., Szilak, I., Steuer, E.R., Sheetz, M.P., and Cleveland, D.W. (1991). Dynactin, a conserved,  
509 ubiquitously expressed component of an activator of vesicle motility mediated by cytoplasmic dynein. *J Cell Biol*  
510 *115*, 1639–1650.
- 511 Heidemann, S.R., Landers, J.M., and Hamborg, M.A. (1981). Polarity orientation of axonal microtubules. *J Cell Biol*  
512 *91*, 661–665.
- 513 Hirokawa, N., Niwa, S., and Tanaka, Y. (2010). Molecular Motors in Neurons: Transport Mechanisms and Roles in  
514 Brain Function, Development, and Disease. *Neuron* *68*, 610–638.
- 515 Inagaki, N., Chihara, K., Arimura, N., Ménager, C., Kawano, Y., Matsuo, N., Nishimura, T., Amano, M., and Kaibuchi,  
516 K. (2001). CRMP-2 induces axons in cultured hippocampal neurons. *Nat. Neurosci.* *4*, 781–782.

- 517 Jakobs, M.A.H., Franze, K., and Zemel, A. (2020). Mechanical Regulation of Neurite Polarization and Growth: A  
518 Computational Study. *Biophysical Journal* *118*, 1914–1920.
- 519 Jakobs, M.A., Dimitracopoulos, A., and Franze, K. (2019). KymoButler, a deep learning software for automated  
520 kymograph analysis. *eLife Sciences* *8*, 168.
- 521 Jakobs, M., Franze, K., and Zemel, A. (2015). Force Generation by Molecular-Motor-Powered Microtubule Bundles;  
522 Implications for Neuronal Polarization and Growth. *Front Cell Neurosci* *9*, 441.
- 523 Kuijpers, M., and Hoogenraad, C.C. (2011). Centrosomes, microtubules and neuronal development. *Mol. Cell.*  
524 *Neurosci.* *48*, 349–358.
- 525 Lazarus, J.E., Moughamian, A.J., Tokito, M.K., and Holzbaur, E.L.F. (2013). Dynactin subunit p150(Glued) is a  
526 neuron-specific anti-catastrophe factor. *PLoS Biol.* *11*, e1001611.
- 527 Liang, X., Kokes, M., Fetter, R.D., Sallee, M.D., Moore, A.W., Feldman, J.L., and Shen, K. (2020). Growth cone-  
528 localized microtubule organizing center establishes microtubule orientation in dendrites. *eLife Sciences* *9*, 308.
- 529 Lowery, L.A., and Van Vactor, D. (2009). The trip of the tip: understanding the growth cone machinery. *Nat. Rev.*  
530 *Mol. Cell Biol.* *10*, 332–343.
- 531 Mattie, F.J., Stackpole, M.M., Stone, M.C., Clippard, J.R., Rudnick, D.A., Qiu, Y., Tao, J., Allender, D.L., Parmar, M.,  
532 and Rolls, M.M. (2010). Directed microtubule growth, +TIPs, and kinesin-2 are required for uniform microtubule  
533 polarity in dendrites. *Curr. Biol.* *20*, 2169–2177.
- 534 Millicamps, S., and Julien, J.-P. (2013). Axonal transport deficits and neurodegenerative diseases. *Nature*  
535 *Publishing Group* *14*, 161–176.
- 536 Molines, A.T., Lemièrè, J., Edrington, C.H., Hsu, C.-T., Steinmark, I.E., Suhling, K., Goshima, G., Holt, L.J., Brouhard,  
537 G.J., and Chang, F. (2020). Physical properties of the cytoplasm modulate the rates of microtubule growth and  
538 shrinkage. *bioRxiv* *265*, 2020.10.27.352716.
- 539 Moughamian, A.J., and Holzbaur, E.L.F. (2012). Dynactin is required for transport initiation from the distal axon.  
540 *Neuron* *74*, 331–343.
- 541 Mukherjee, A., Jenkins, B., Fang, C., Radke, R.J., Banker, G., and Roysam, B. (2011). Automated kymograph analysis  
542 for profiling axonal transport of secretory granules. *Medical Image Analysis* *15*, 354–367.
- 543 Mukherjee, A., Brooks, P.S., Bernard, F., Guichet, A., and Conduit, P.T. (2020). Microtubules originate  
544 asymmetrically at the somatic golgi and are guided via Kinesin2 to maintain polarity within neurons. *eLife Sciences*  
545 *9*, 2191.
- 546 Nguyen, M.M., McCracken, C.J., Milner, E.S., Goetschius, D.J., Weiner, A.T., Long, M.K., Michael, N.L., Munro, S.,  
547 and Rolls, M.M. (2014).  $\Gamma$ -tubulin controls neuronal microtubule polarity independently of Golgi outposts. *Mol.*  
548 *Biol. Cell* *25*, 2039–2050.
- 549 Nieuwburg, R., Nashchekin, D., Jakobs, M., Carter, A.P., Khuc Trong, P., Goldstein, R.E., and St Johnston, D. (2017).  
550 Localised dynactin protects growing microtubules to deliver oskar mRNA to the posterior cortex of the *Drosophila*  
551 oocyte. *eLife Sciences* *6*, 711.
- 552 Oelz, D.B., del Castillo, U., Gelfand, V.I., and Mogilner, A. (2018). Microtubule Dynamics, Kinesin-1 Sliding,  
553 and Dynein Action Drive Growth of Cell Processes. *Biophysical Journal* *115*, 1614–1624.

- 554 Plough, H.H., and Ives, P.T. (1935). Induction of Mutations by High Temperature in *Drosophila*. *Genetics* *20*, 42–69.
- 555 Pool, M., Thiemann, J., Bar-Or, A., and Fournier, A.E. (2008). NeuriteTracer: a novel ImageJ plugin for automated  
556 quantification of neurite outgrowth. *Journal of Neuroscience Methods* *168*, 134–139.
- 557 Rao, A.N., Patil, A., Black, M.M., Craig, E.M., Myers, K.A., Yeung, H.T., and Baas, P.W. (2017). Cytoplasmic Dynein  
558 Transports Axonal Microtubules in a Polarity-Sorting Manner. *Cell Rep* *19*, 2210–2219.
- 559 Sanchez-Soriano, N., Gonçalves Pimentel, C., Beaven, R., Haessler, U., Ofner Ziegenfuss, L., Ballestrem, C., and  
560 Prokop, A. (2010). *Drosophila* growth cones: A genetically tractable platform for the analysis of axonal growth  
561 dynamics. *Developmental Neurobiology* *70*, 58–71.
- 562 Sánchez-Huertas, C., Freixo, F., Viais, R., Lacasa, C., Soriano, E., and Lüders, J. (2016). Non-centrosomal nucleation  
563 mediated by augmin organizes microtubules in post-mitotic neurons and controls axonal microtubule polarity. *Nat*  
564 *Commun* *7*.
- 565 Schindelin, J., Arganda-Carreras, I., Frise, E., Kaynig, V., Longair, M., Pietzsch, T., Preibisch, S., Rueden, C., Saalfeld,  
566 S., Schmid, B., et al. (2012). Fiji: an open-source platform for biological-image analysis. *Nat. Methods* *9*, 676–682.
- 567 Seetapun, D., and Odde, D.J. (2010). Cell-length-dependent microtubule accumulation during polarization. *Curr.*  
568 *Biol.* *20*, 979–988.
- 569 Shimada, Y., Yonemura, S., Ohkura, H., Strutt, D., and Uemura, T. (2006). Polarized Transport of Frizzled along the  
570 Planar Microtubule Arrays in *Drosophila* Wing Epithelium. *Dev. Cell* *10*, 209–222.
- 571 Stepanova, T., Slemmer, J., Hoogenraad, C.C., Lansbergen, G., Dortland, B., De Zeeuw, C.I., Grosveld, F., van  
572 Cappellen, G., Akhmanova, A., and Galjart, N. (2003). Visualization of microtubule growth in cultured neurons via  
573 the use of EB3-GFP (end-binding protein 3-green fluorescent protein). *J. Neurosci.* *23*, 2655–2664.
- 574 Stone, M.C., Roegiers, F., and Rolls, M.M. (2008). Microtubules have opposite orientation in axons and dendrites of  
575 *Drosophila* neurons. *Mol. Biol. Cell* *19*, 4122–4129.
- 576 Tas, R.P., Chazeau, A., Cloin, B.M.C., Lambers, M.L.A., Hoogenraad, C.C., and Kapitein, L.C. (2017). Differentiation  
577 between Oppositely Oriented Microtubules Controls Polarized Neuronal Transport. *Neuron* *96*, 1264–1271.e1265.
- 578 Twelvetrees, A.E., Pernigo, S., Sanger, A., Guedes-Dias, P., Schiavo, G., Steiner, R.A., Dodding, M.P., and Holzbaur,  
579 E.L.F. (2016). The Dynamic Localization of Cytoplasmic Dynein in Neurons Is Driven by Kinesin-1. *Neuron* *90*, 1000–  
580 1015.
- 581 van Beuningen, S.F.B., Will, L., Harterink, M., Chazeau, A., van Battum, E.Y., Frias, C.P., Franker, M.A.M., Katrukha,  
582 E.A., Stucchi, R., Vocking, K., et al. (2015). TRIM46 Controls Neuronal Polarity and Axon Specification by Driving the  
583 Formation of Parallel Microtubule Arrays. *Neuron* *88*, 1208–1226.
- 584 Vasquez, R.J., Howell, B., Yvon, A.M., Wadsworth, P., and Cassimeris, L. (2017). Nanomolar concentrations of  
585 nocodazole alter microtubule dynamic instability in vivo and in vitro. *Mol. Biol. Cell* *8*, 973–985.
- 586 Waterman-Storer, C.M., Karki, S.B., Kuznetsov, S.A., Tabb, J.S., Weiss, D.G., Langford, G.M., and Holzbaur, E.L.  
587 (1997). The interaction between cytoplasmic dynein and dynactin is required for fast axonal transport. *Pnas* *94*,  
588 12180–12185.
- 589 Yannoni, Y.M., and White, K. (1997). Association of the neuron-specific RNA binding domain-containing protein  
590 ELAV with the coiled body in *Drosophila* neurons. *Chromosoma* *105*, 332–341.



- 591 Yau, K.W., Schätzle, P., Tortosa, E., Pagès, S., Holtmaat, A., Kapitein, L.C., and Hoogenraad, C.C. (2016). Dendrites In  
592 Vitro and In Vivo Contain Microtubules of Opposite Polarity and Axon Formation Correlates with Uniform Plus-End-  
593 Out Microtubule Orientation. *J. Neurosci.* *36*, 1071–1085.
- 594 Yu, W., and Baas, P.W. (1994). Changes in microtubule number and length during axon differentiation. *Journal of*  
595 *Neuroscience* *14*, 2818–2829.
- 596 Yu, W., Qiang, L., Solowska, J.M., Karabay, A., Korulu, S., and Baas, P.W. (2008). The Microtubule-severing Proteins  
597 Spastin and Katanin Participate Differently in the Formation of Axonal Branches. *Mol. Biol. Cell* *19*, 1485–1498.

598 **Figures**

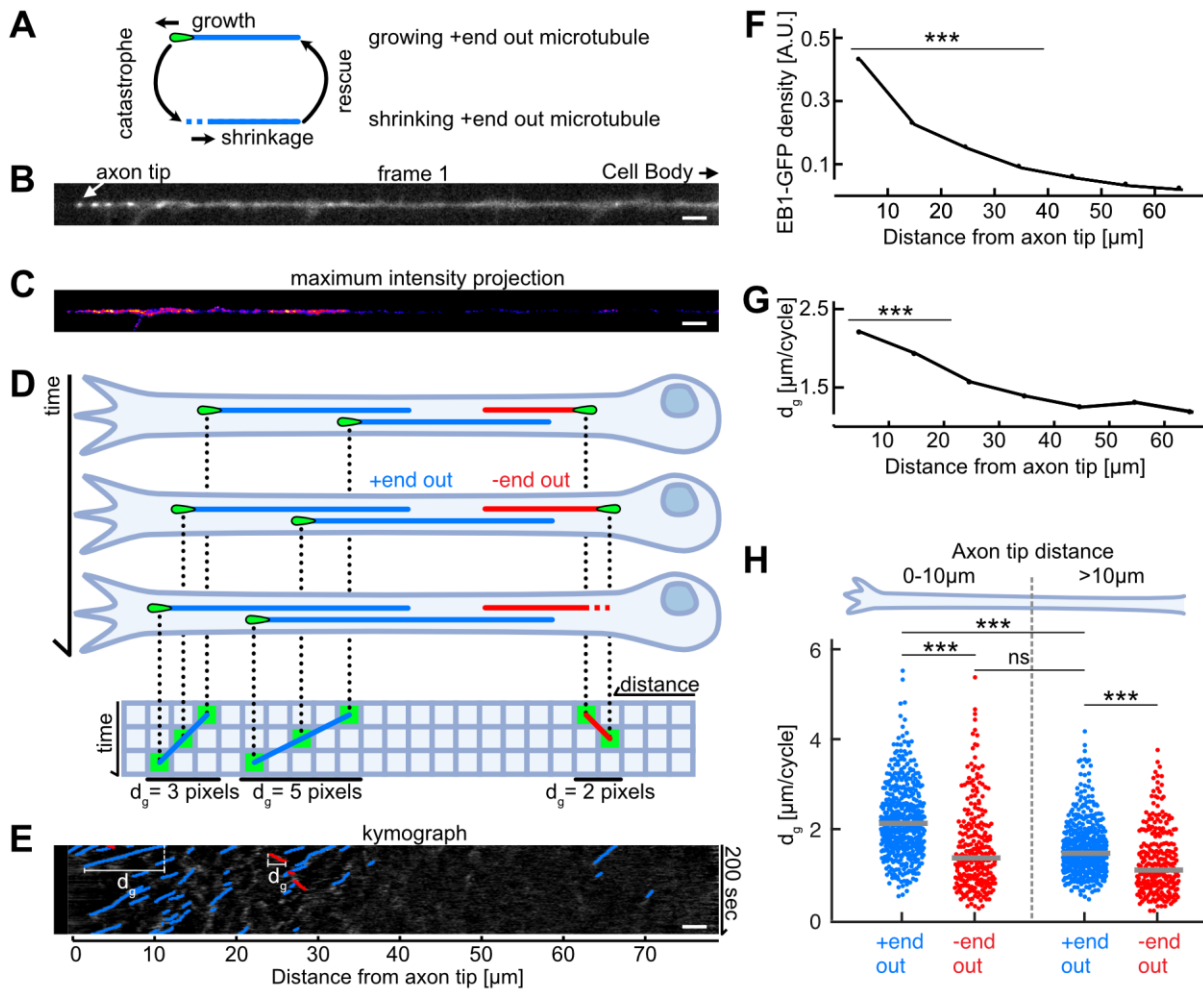

599

600 **Figure 1: Axonal microtubule orientation and localization regulate microtubule growth.** (A) Schematic depicting  
 601 the microtubule growth and shrinkage cycle. Microtubules grow until they undergo a catastrophe, which initiates  
 602 microtubule shrinkage and can start growing again after a rescue event. During growth (but not shrinkage) EB1  
 603 localizes to microtubule tips. (B) First frame of a live cell imaging movie of axonal EB1-GFP dynamics. Bright dots  
 604 represent individual EB1-GFP puncta, which label growing microtubule +ends. (C) Maximum intensity projection of  
 605 a 200 seconds long movie depicting EB1-GFP dynamics in a *D melanogaster* axon. EB1-GFP density is increased  
 606 towards the tip. (D) Schematic showing how EB1-GFP live imaging movies were visualized and analyzed using  
 607 kymographs. The growing tips of +end out microtubules (blue) and -end out microtubules (red) were fluorescently  
 608 labelled with EB1-GFP (green tear drop shaped 'comets'). The same axon is shown at three different time points;

609 microtubules grow at their +end, where EB1-GFP is located. The axonal intensity profiles of all time points are plotted  
610 underneath each other, resulting in a space-time grid called 'kymograph'. Connecting puncta between consecutive  
611 kymograph lines with blue/red lines yields the overall displacement  $d_g$  for individual microtubule growth events.  
612 Note that the red -end out microtubule stops growing in the 2<sup>nd</sup> frame and shrinks in the 3<sup>rd</sup> frame **(E)** Kymograph  
613 showing EB1-GFP dynamics analyzed with *KymoButler* (Jakobs et al., 2019). Lines with a positive slope (blue, left to  
614 right upwards) are microtubules growing with their +end towards the axon tip, lines with negative slope (red, left to  
615 right downwards) are microtubules growing away from the tip. Horizontal bars indicate the growth lengths ( $d_g$ ) for  
616 individual microtubule growth cycles. **(F)** EB1-GFP comet density as a function of the distance from the axon tip.  
617 Most microtubule polymerization occurred near the advancing axon tip. (N = 346, 20 biological replicates,  $p < 10^{-20}$ ,  
618 Kruskal Wallis test,  $p < 10^{-7}$  for pairwise comparisons between bin 1-4, Dunn-Sidak post hoc test). **(G)** Microtubule  
619 added length per cycle  $d_g$  as a function of distance from the axon tip. Microtubules grew longer in the vicinity of the  
620 axon tip ( $p < 10^{-20}$ , Kruskal Wallis test,  $p < 10^{-7}$  for pairwise comparisons of either bin 1 or 2 with any other bin, Dunn-  
621 Sidak post hoc test). **(H)**  $d_g$  for +end out (blue) and -end out (red) microtubules grouped for growth in the distalmost  
622 10  $\mu\text{m}$  of the axon tip, and further away than 10  $\mu\text{m}$  from the axon tip. Each dot represents the average of one axon  
623 in the respective region, grey lines indicate median values. With  $d_g = 2.24 \pm 0.00 \mu\text{m} / \text{cycle}$  (mean  $\pm$  SEM), +end out  
624 microtubules near the axon tip grew significantly longer than -end out microtubules ( $d_g = 1.68 \pm 0.00 \mu\text{m} / \text{cycle}$ ) and  
625 microtubules located further away from the tip (N = 346 axons, 20 biological replicates;  $p < 10^{-30}$ , Kruskal Wallis test  
626 followed by Dunn-Sidak post hoc test; \*\*\*  $p < 10^{-4}$ ). Scale bars: 3  $\mu\text{m}$ .

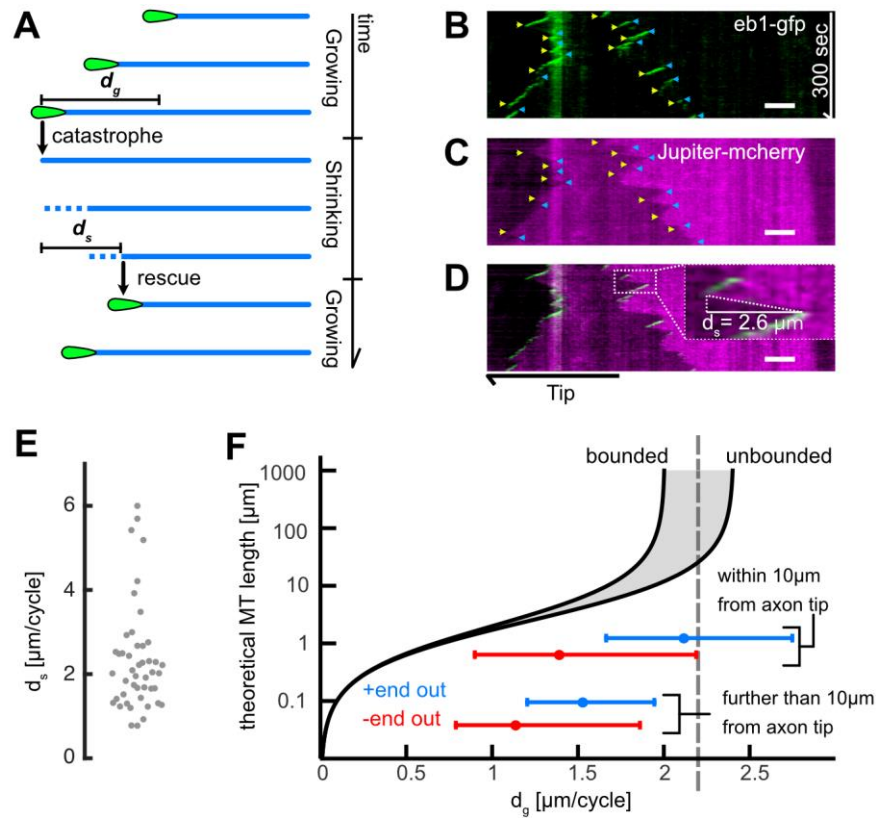

627

628 **Figure 2: Microtubule length depends on growth length per cycle.** (A) Schematic highlighting the assumptions of  
 629 our two-state master equation model. Microtubules were assumed to occupy either a growing or shrinking state.  
 630 During a growth cycle, the average microtubule length increases by  $d_g$ , during a shrinkage cycle, microtubule length  
 631 decreases by  $d_s$ . Additionally, microtubules were able to stochastically switch between the two states as shown in  
 632 **Figure 1A.** (B-D) Kymographs from a *D. melanogaster* axon that expressed (B) EB1-GFP (green) and (C) Jupiter-  
 633 mCherry, a tubulin label (magenta). Individual microtubule shrinkage events, visible as (C) fluorescent edges and (D)  
 634 dashed white lines in the kymograph, yielded microtubule shrinkage lengths per cycle  $d_s$ . Yellow and blue markers  
 635 in B & C indicate start and end points of an individual shrinkage event and the inset in D highlights an individual  
 636 shrinkage event. Scale bars: 3  $\mu\text{m}$ . (E) Average  $d_s$  values for N=47 axons (3 biological replicates; mean:  $2.20 \pm 0.20 \mu\text{m}$   
 637 ( $\pm$  s.e.m). (F) A plot of the estimated overall microtubule length  $l_{MT}$  as a function of  $d_g$  with  $d_s = 2.20 \pm 0.20 \mu\text{m}$ . The  
 638 two solid black lines indicate the lower and upper bounds of the average microtubule lengths for a given  $d_g$  with  $d_s$   
 639 = 2.0 or 2.4  $\mu\text{m}$ . One can separate two regimes; “unbounded” and “bounded” growth, separated by a dashed line.  
 640 Blue and red horizontal lines represent median  $\pm$  lower and upper quantiles for +end out and -end out microtubules,

641 respectively. The top two lines represent microtubules found at the distalmost 10  $\mu\text{m}$  of the axon, the bottom lines  
642 microtubules found further than 10  $\mu\text{m}$  away. +end out microtubules close to the tip were considerably more likely  
643 to exhibit unbounded growth than +end out microtubules further away from the tip and -end out microtubules.

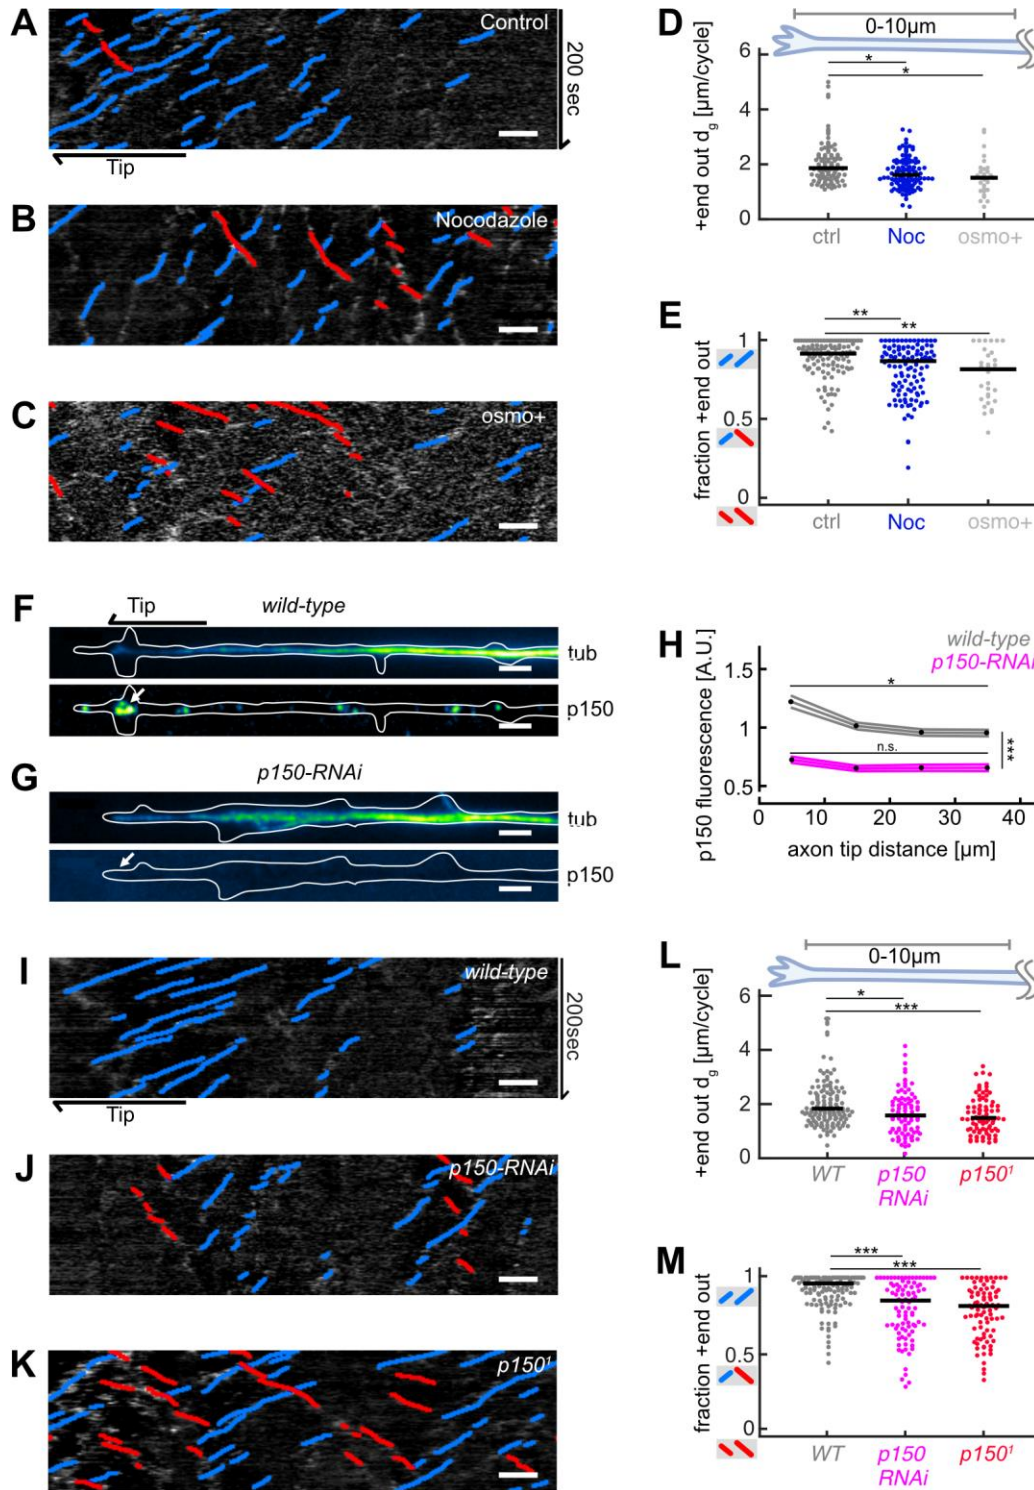

644

645 **Figure 3: Decreased microtubule growth decreases axonal microtubule orientation. (A-C)** Representative

646 kymographs analyzed with *KymoButler* (Jakobs et al., 2019) from axonal processes treated with (A) 0.025% DMSO

647 (control) for 8h, **(B)** 5uM Nocodazole for 8h, **(C)** medium with increased osmolarity (“osmo+”) for 22h. Growth of  
648 +end out microtubules is shown as blue lines, -end microtubules are red. Scale bars = 3 $\mu$ m. **(D)** Added growth lengths  
649 per cycle  $d_g$  of +end out microtubules at the distalmost 10 $\mu$ m from the axon tip for control (N = 107 axons from 5  
650 biological replicates), nocodazole-treated axons (N = 116 axons from 3 biological replicates), and axons cultured in  
651 osmo+ medium (N = 30, 2 biological replicates). Microtubule lengths increased significantly less per growth cycle in  
652 axons treated with Nocodazole or osmo+ media than controls ( $p < 10^{-4}$ , Kruskal Wallis test, \*  $p < 0.05$  for pairwise  
653 comparisons, Dunn-Sidak post hoc test). **(E)** The fraction of +end out microtubules, in the different groups.  
654 Microtubule orientation was calculated by counting all microtubules that grew away from the cell body (blue lines  
655 in kymographs) and dividing them by all growing microtubules (blue and red). This way, a kymograph with only blue  
656 lines gives a value of 1 while an equal number of blue and red lines yields a value of 0.5. Microtubules in axons  
657 treated with Nocodazole or osmo+ media were significantly less uniformly oriented than those in the control group,  
658 i.e., they contained a larger fraction of microtubules pointing with their +ends toward the cell body (red lines in **(A-**  
659 **C)**) ( $p < 10^{-4}$ , Kruskal Wallis test, \*\*  $p < 10^{-2}$  for pairwise comparisons, Dunn-Sidak post hoc test). **(F-G)** Tubulin (top)  
660 and normalized p150 (bottom) immunostaining of cultured *D. melanogaster* larvae axonal processes of **(F)** controls  
661 and **(G)** neurons expressing *elav-gal4* UAS driven *p150-RNAi*. Large p150 puncta were found clustered around the  
662 axon tip (arrow) in controls **(F)** but not in *p150-RNAi* axons **(G)**. Scale bars = 2 $\mu$ m **(H)** Normalized p150 fluorescence  
663 intensity as a function of distance from the axon tip for *wild-type* axons (N = 33) and *p150-RNAi* axons (N = 32, 2  
664 biological replicates). Lines represent mean  $\pm$  s.e.m. for *wild-type* (grey) and *p150-RNAi* (magenta). P150  
665 fluorescence intensities changed along the axon ( $p < 10^{-70}$ ; Kruskal Wallis test). In *wild-type* axons, p150 was enriched  
666 at the axon tip (\*  $p < 0.05$  between bin 1 and bin 3 or 4; pairwise comparisons with Dunn-Sidak post hoc test), but  
667 not in *p150-RNAi* expressing axons ( $p > 0.05$  for all pairwise comparisons). Overall, p150 expression levels were  
668 diminished in *p150-RNAi* axons compared to *wild-type* (\*\*\*) ( $p < 10^{-7}$  for any pairwise comparison between conditions).  
669 **(I-K)** *KymoButler* output for kymographs of EB1-GFP expressed in **(I)** a *wild-type* axon, **(J)** an axon expressing p150-  
670 RNAi, and **(K)** an axon in a *p150<sup>1/+</sup>* mutant background. Scale bars = 3  $\mu$ m. Blue/red lines represent microtubules  
671 with +/-end out orientation, respectively. **(L)** +end out microtubule added length per cycle  $d_g$  for *wild-type* (N = 85,  
672 9 biological replicates), *p150-RNAi* (N = 34, 3 biological replicates), and *p150<sup>1/+</sup>* (N = 83, 6 biological replicates).  
673 Microtubule growth lengths were significantly decreased in both *p150-RNAi* and *p150<sup>1</sup>* conditions compared to

674 controls ( $p < 10^{-9}$ , Kruskal Wallis test,  $**p < 0.001$ ,  $*p < 0.05$ , Dunn-Sidak post hoc test). **(M)** Microtubule orientation  
675 for *wild-type*, *p150-RNAi*, and *p150<sup>1/+</sup>*. Microtubules were less uniformly oriented in both *p150-RNAi* and *p150<sup>1</sup>*  
676 axons ( $p < 10^{-9}$ , Kruskal Wallis test,  $*** p < 10^{-5}$  for pairwise comparisons with Dunn-Sidak post hoc test). Overall,  
677 axonal microtubule orientation was decreased after chemical, physical, and genetic perturbations of microtubule  
678 growth.

679



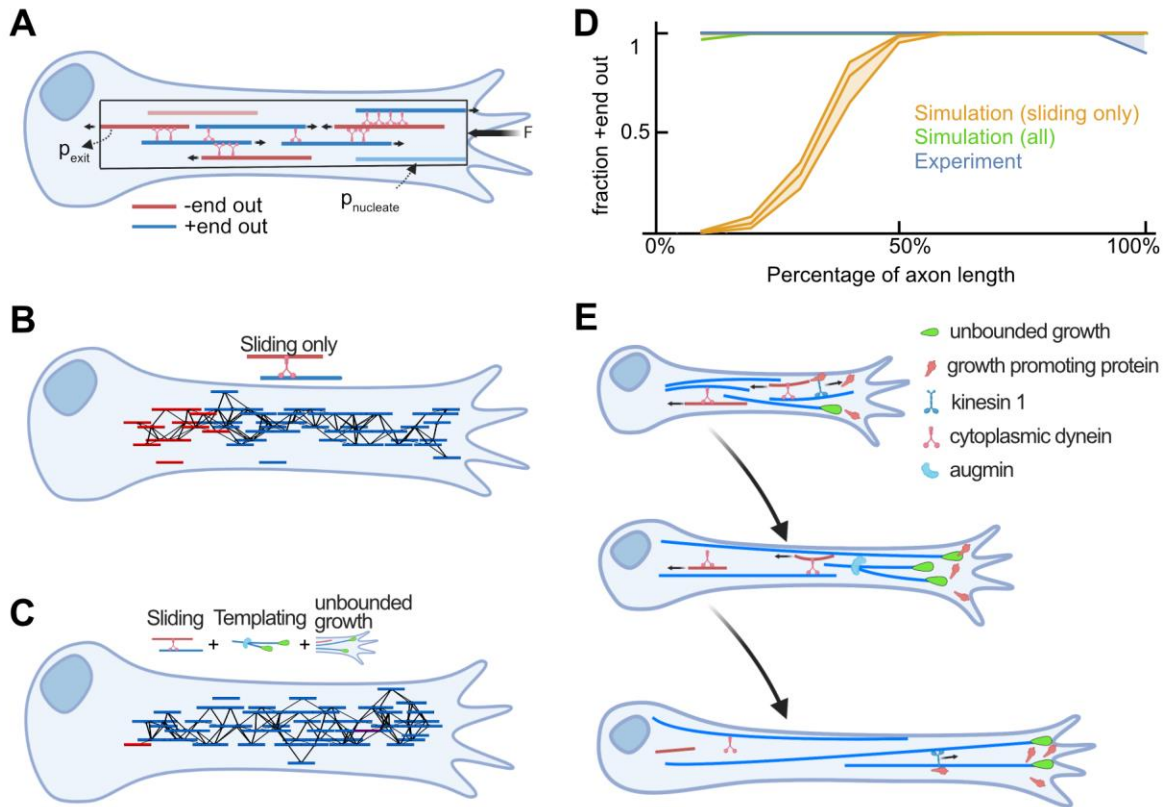

680

681 **Figure 4: Unbounded microtubule growth into the advancing axon tip is required to establish axonal microtubule**

682 **orientation. (A)** Schematic showing the microtubule sliding simulation and its relevant parameters. **(B-D)** Simulation

683 of microtubule dynamics. **(B)** Snapshot of a simulated axon with dynein-based sliding of microtubules. -end out

684 microtubules accumulated within the proximal axon. **(C)** Snapshot of an axon simulated with sliding, augmin

685 templating (new microtubules were likely oriented into the same direction as their surrounding ones), and higher

686 likelihood of unbounded growth for +end out microtubules. Much like in real axons, most microtubules were

687 oriented with their +end out throughout the axon. **(D)** Microtubule orientation along the normalized axon length for

688 the simulations with sliding only (orange trace), with sliding, templating, and unbonded growth (green), and our

689 experimental data (blue). Lines represent 30% to 70% quantiles. There was excellent agreement between the

690 experimental and *in silico* data. **(E)** Summary of proposed mechanism for establishing microtubule orientation in

691 axons. Red and blue lines represent -end out and +end out microtubules, respectively. Green drop shapes indicate

692 unbounded microtubule growth into the axon tip for +end out microtubules. Kinesin 1 deposits microtubule growth

693 promoting proteins, such as p150, at axon tips (**SUPPLEMENTARY FIGURE 4**), leading to local unbounded growth of +end  
694 out microtubules. Augmin templating and cell body-directed sliding of -end out microtubules further amplifies this  
695 bias. All three mechanisms together lead to a +end out microtubule cytoskeleton.
